# Supplementary material for: Clinical Relevance of Topical Antibiotic Use in Coselecting for Multidrug-Resistant Staphylococcus aureus: Insights from In Vitro and Ex Vivo Models
Source: PubMed Central journal article supplement (PMC8092865; doi:10.1128/aac.02048-20), 2021-04-19
Supplement: AAC.02048-20-s000S2.pdf [file AAC.02048-20-s000S2.pdf]

## SUPPLEMENTARY DATA

**Supplementary Table 2 – Phenotypic antibiotic susceptibilities of *S. aureus* wild-type, mutant and complemented strains to fusidic acid (FA) and mupirocin as determined by broth micro-dilution assays in this study.**

| Strain                    | WGS ID        | FA MIC (mg/L) / Log <sub>2</sub> fold-change relative to wild-type MIC | Mupirocin MIC (mg/L) / Log <sub>2</sub> fold-change relative to wild-type MIC |
|---------------------------|---------------|------------------------------------------------------------------------|-------------------------------------------------------------------------------|
| NZ14132                   | DW-38-S034-SA | 4 / 0                                                                  | >1024 / 0                                                                     |
| NZ14132 <i>fusC</i>       | DW-38-S035-SA | 0.0625 / -6                                                            | ND*                                                                           |
| NZ14132 <i>fusC::fusC</i> | DW-38-S001-SA | 4 / 0                                                                  | ND                                                                            |
| NZ14132 <i>mupA</i>       | DW-38-S036-SA | ND                                                                     | 0.25 / -12                                                                    |
| NZ14132 <i>mupA::mupA</i> | DW-38-S005-SA | ND                                                                     | >1024 / 0                                                                     |
| NZ14487                   | DW-38-S047-SA | 4 / 0                                                                  | >1024 / 0                                                                     |
| NZ14487 <i>fusC</i>       | DW-38-S048-SA | 0.0625 / -6                                                            | ND                                                                            |
| NZ14487 <i>fusC::fusC</i> | DW-38-S060-SA | 4 / 0                                                                  | ND                                                                            |
| NZ14487 <i>mupA</i>       | DW-38-S049-SA | ND                                                                     | 0.25 / -12                                                                    |
| NZ14487 <i>mupA::mupA</i> | DW-38-S007-SA | ND                                                                     | >1024 / 0                                                                     |
| NZAK3                     | DW-38-S061-SA | 4 / 0                                                                  | ND                                                                            |
| NZAK3 <i>fusC</i>         | DW-38-S062-SA | 0.0625 / -6                                                            | ND                                                                            |
| NZAK3 <i>fusC::fusC</i>   | DW-38-S003-SA | 4 / 0                                                                  | ND                                                                            |

\*Abbreviations: ND, not determined.

**Supplementary Table 3 – Primer sequences used in the study**

| Primer       | Sequence (5' to 3' direction)                                              | Description                                                                                            |
|--------------|----------------------------------------------------------------------------|--------------------------------------------------------------------------------------------------------|
| FUSC-Fp      | CCTCACTAAAGGGAACAAAAGC<br>TGGGTACCAATAAAATAATGGTG<br>CTTGGGAAAGAAAAG       | Flanking primers used for amplification of gene cassettes for <i>fusC</i> deletion and complementation |
| FUSC-Rp      | CGACTCACTATAGGGCGAATTGG<br>AGCTCAAAACAATAATAGCTATC<br>TGTCAGTCTACC         |                                                                                                        |
| FUSC-KO-Fp   | GTA CTTCAACAAAAATGGAGGA<br>ATATGAAATCCAAACAGCCCTGA<br>TCTTTAGAACTAATG      | Construction of gene cassettes for <i>fusC</i> deletion by SOE PCR                                     |
| FUSC-KO-Rp   | CATTAGTTCTAAAGATCAGGGCT<br>GTTTGGATTTCATATTCCTCCATT<br>TTTGTTGAAGTAC       |                                                                                                        |
| FUSC-COMP-Fp | ATGAATTAAGTCTACATCCAA<br>GATTTTG                                           | Construction of gene cassettes for <i>fusC</i> complementation by SOE PCR                              |
| FUSC-COMP-Rp | CAAAATCTTGGATGTAGACTTTT<br>AATTCAT                                         |                                                                                                        |
| FUSC-OUT-Fp  | CATTATCCTTGAAGACAGTTTATC<br>CTGTAG                                         | Confirmation on chromosomal integration of gene cassettes for <i>fusC</i> deletion and complementation |
| FUSC-OUT-Rp  | CAGCAATATGATAACCACAATTA<br>AACGTAC                                         |                                                                                                        |
| MUPA-Fp      | CCTCACTAAAGGGAACAAAAGC<br>TGGGTACCGAAAGGATGATTAAC<br>TGATGAATAGAGCAG       | Flanking primers used for amplification of gene cassettes for <i>mupA</i> deletion and complementation |
| MUPA-Rp      | CGACTCACTATAGGGCGAATTGG<br>AGCTCCAATATCAAATTCTCTATC<br>TCCATATAAAC         |                                                                                                        |
| MUPA-KO-Fp   | GAAATAAGTGATACTCTAGGAGG<br>CTGAAAAGTTACAAACATGGCCA<br>CTCTATTTTAGTAGAGTG   | Construction of gene cassettes for <i>mupA</i> deletion by SOE PCR                                     |
| MUPA-KO-Rp   | CACTCTACTAAAATAGAGTGGCC<br>ATGTTTGTAAC TTTTCAGCCTCCT<br>AGAGTATCACTTATTTTC |                                                                                                        |
| MUPA-COMP-   | CTTAGTTGCCCTAAGTGTAATGG                                                    | Construction of gene cassettes                                                                         |

|                  |                                                                     |                                                                                                                 |
|------------------|---------------------------------------------------------------------|-----------------------------------------------------------------------------------------------------------------|
| Fp               | GAAAATGTCGCGAGTAGAAGAA<br>GTAATCGATGTTTG                            | for <i>mupA</i> complementation by<br>SOE PCR                                                                   |
| MUPA-COMP-<br>Rp | CAAACATCGATTACTTCTTCTACT<br>CGCGACATTTTCCCATTACACTTA<br>GGGCAACTAAG |                                                                                                                 |
| MUPA-OUT-Fp      | AGTTAAAAAGTAGAACCATTAAT<br>TTTAAATGG                                | Confirmation on chromosomal<br>integration of gene cassettes<br>for <i>mupA</i> deletion and<br>complementation |
| MUPA-OUT-Rp      | AATCTAATGGAAATTTTCTAATG<br>CTAGAG                                   |                                                                                                                 |
| pIMAY-Z-Fp       | GGTACCCAGCTTTTGTTCCCTTTA<br>GTGAGG                                  | Amplification of pIMAY-Z<br>vector                                                                              |
| pIMAY-Z-Rp       | GAGCTCCAATTCGCCCTATAGTG<br>AGTCG                                    |                                                                                                                 |

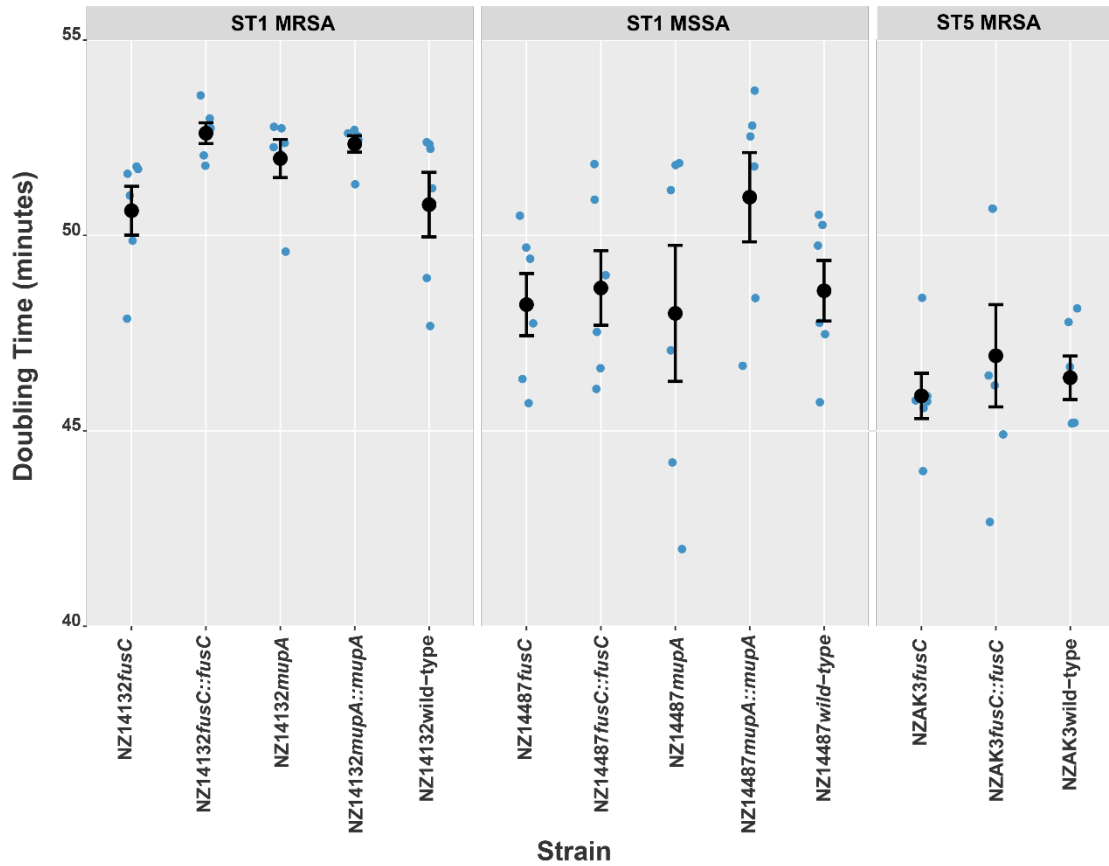

**Supplementary Figure 1 – Doubling times for *S. aureus* wild-type, complemented, and mutant strains grown in BHI broth.** For each strain tested, six biological replicates (blue dots) were included for determining mean doubling times (black dots) and SEM (black error bars). No significant difference ( $P > 0.05$ , unpaired t test) in doubling time was observed when comparing the complemented and mutant strains to their respective wild-type.
